# Supplementary material
Source: publisher site journal article supplement (https://www.dovepress.com/article/541786)
Supplement: Supplementary file 1 [file 541786%20Revised%20supplementary.docx]

**SUPPLEMENTARY**

**SUPPLEMENTARY 1**

**Supplementary Table 1: Associations of Multivariable Regression, GEE, and LMM**

| Dependent Variable | Predictor | Model | Cohortp | β (95% Confidence Interval) | p-value |
| --- | --- | --- | --- | --- | --- |
| **Mean Arteriolar Width** | Male vs Female | GEE | Pooled HIV+ | 11.92 (4.01, 19.82) | 0.003 |
| Male vs Female | LMM | Pooled HIV+ | 11.92 (4.49, 19.34) | 0.002 |
| CD4% | Linear | HIV-NART | 2.14 (0.93, 3.36) | < 0.001 |
| CD4% | Linear . | HIV-ART | 1.00 (0.02, 1.97) | 0.05 |
| CD4% | GEE | Pooled HIV+ | -0.52 (-1.02, -0.02) | 0.042 |
| Viral Load | Linear | HIV-NART | -23.17 (-45.60, -0.73) | 0.04 |
| ART Duration | GEE | Pooled HIV+ | 2.06 (0.92, 3.20) | < 0.001 |
| **Mean Venular Width** | CD4 count | Linear | HIV-NART | 0.15 (0.12, 0.19) | < 0.001 |
| CD4 count | Linear . | HIV-ART | 0.02 (0.00, 0.05) | 0.02 |
| CD4% | Linear | HIV-NART | 1.50 (0.88, 2.13) | < 0.001 |
| CD4% | Linear | HIV-ART | 0.92 (0.36, 1.47) | < 0.001 |
| ART Duration | Linear | HIV-ART | -1.40 (-2.57, -0.23) | 0.02 |
| **CRAE** | Male vs Female | GEE | Pooled HIV+ | 44.83 (15.21, 74.45) | 0.003 |
| Male vs Female | LMM | Pooled HIV+ | 44.83 (17.19, 72.47) | 0.002 |
| CD4% | Linear Reg. | HIV-NART | 8.52 (3.88, 13.16) | < 0.001 |
| CD4% | Linear Reg. | HIV-ART | 3.72 (0.09, 7.35) | 0.05 |
| CD4% | GEE | Pooled HIV+ | -1.88 (-3.68, -0.07) | 0.042 |
| Viral Load | Linear | HIV-NART | -92.52 (-178.45, -6.60) | 0.04 |
| Viral Load | Linear | HIV-ART | 81.87 (1.55, 162.19) | 0.05 |
| ART Duration | GEE | Pooled HIV+ | 7.09 (2.97, 11.21) | 0.001 |
| **CRVE** | Male vs Female | GEE | Pooled HIV+ | 0.92 (0.04, 1.79) | 0.04 |
| CD4 count | Linear | HIV-NART | 0.57 (0.45, 0.69) | < 0.001 |
| CD4 count | Linear | HIV-ART | 0.09 (0.01, 0.17) | 0.03 |
| CD4% | Linear | HIV-NART | 5.34 (3.03, 7.64) | < 0.001 |
| CD4% | Linear | HIV-ART | 3.40 (1.30, 5.51) | < 0.001 |
| ART Duration | Linear | HIV-ART | -4.44 (-8.87, -0.01) | 0.05 |

Mean arteriole width (mean A width), Mean venular width (mean V width), Central retinal artery equivalent (CRAE), Central retinal vein equivalent (CRVE), Generalized Estimating Equation (GEE), Linear Mixed Effects Model (LMM)
